# Supplementary material for: α-Synuclein fibrils subvert lysosome structure and function for the propagation of protein misfolding between cells through tunneling nanotubes
Source: PubMed Central journal article supplement (PMC8291706; doi:10.1371/journal.pbio.3001287), 2021-07-20
Supplement: pbio.3001287.s011.pdf [file pbio.3001287.s011.pdf]

## WB Lamp1 – Fig 2A

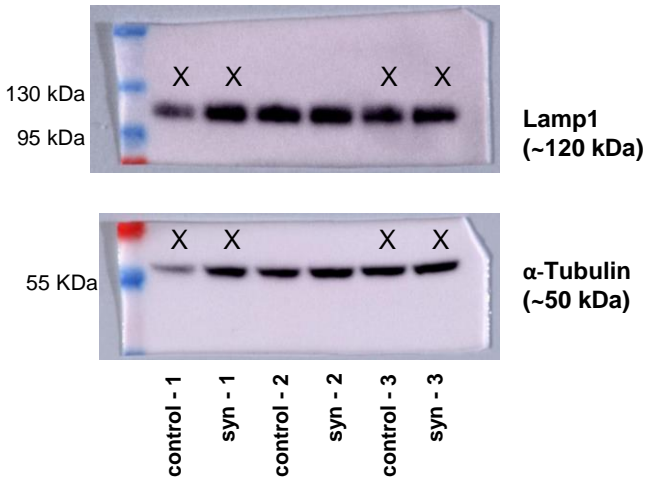

Cell lysates (30 µg/lane) of CAD cells treated for 18 h with α-synuclein fibrils (syn) or not (control).

The specific protein bands were visualized using the ECL-immunoblotting chemiluminescence system (GE Healthcare Life sciences) and the ImageQuant LAS 500TM camera (GE Healthcare Life sciences).

From this original image we generated the image in the Fig 2A.

## WB TFEB – Fig 6C

(1<sup>st</sup> incubation with rabbit anti-TFEB antibody)

(2<sup>nd</sup> incubation with rabbit anti-GAPDH antibody)

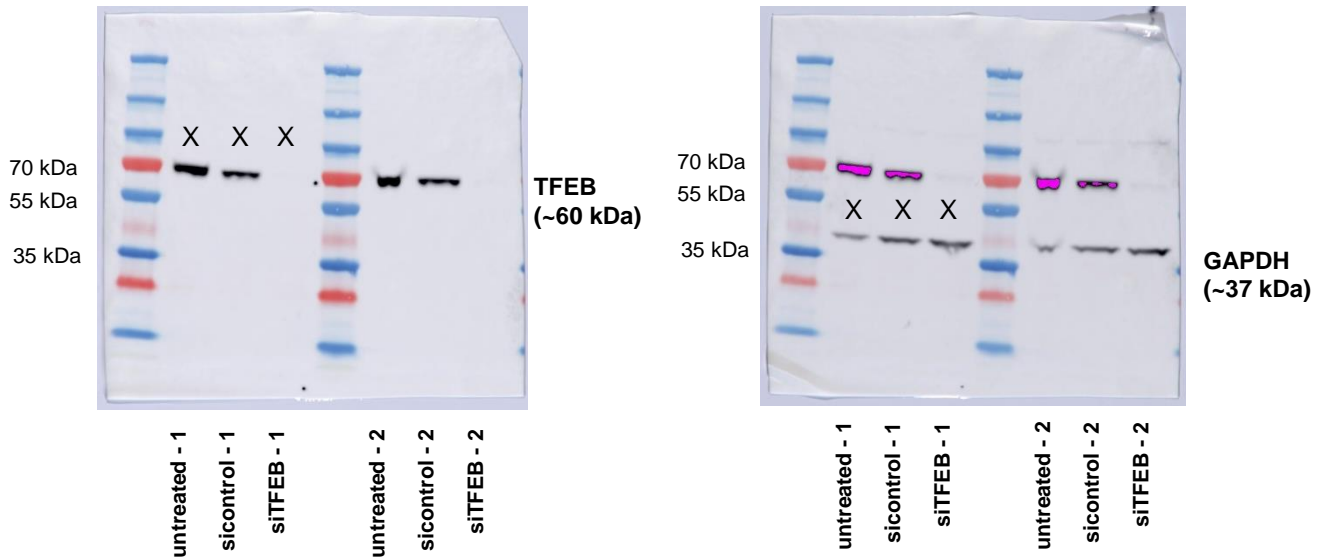

Cell lysates (30 µg/lane) of CAD cells untreated (untreated) or treated for 60 h with siRNA scramble (sicontrol)/siRNA TFEB (siTFEB).

The specific protein bands were visualized using the ECL-immunoblotting chemiluminescence system (GE Healthcare Life sciences) and the ImageQuant LAS 500TM camera (GE Healthcare Life sciences).

From this original image we generated the image in the Fig 6C.

## WB Arl8b – Fig 7C

(1<sup>st</sup> incubation with mouse  $\alpha$ -Tubulin antibody)

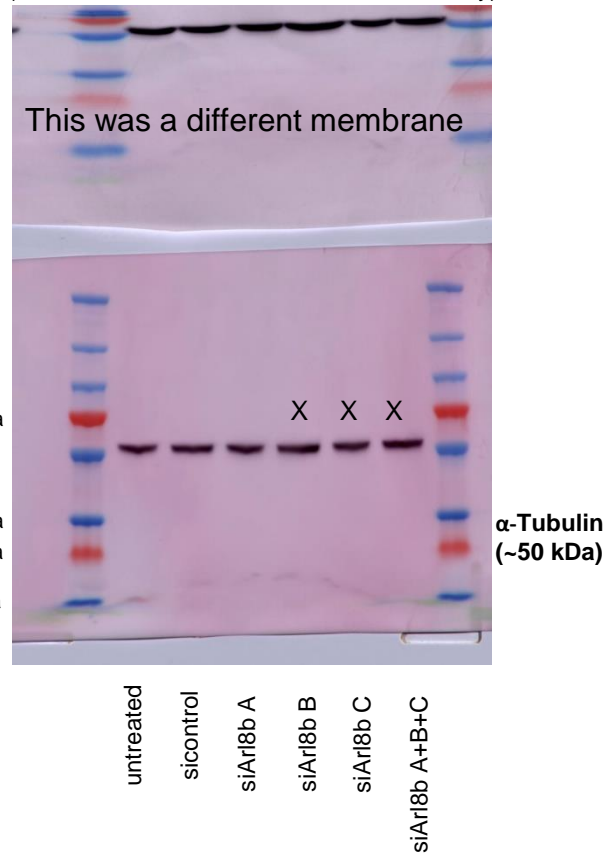

(2<sup>nd</sup> incubation with rabbit anti-Arl8b antibody)

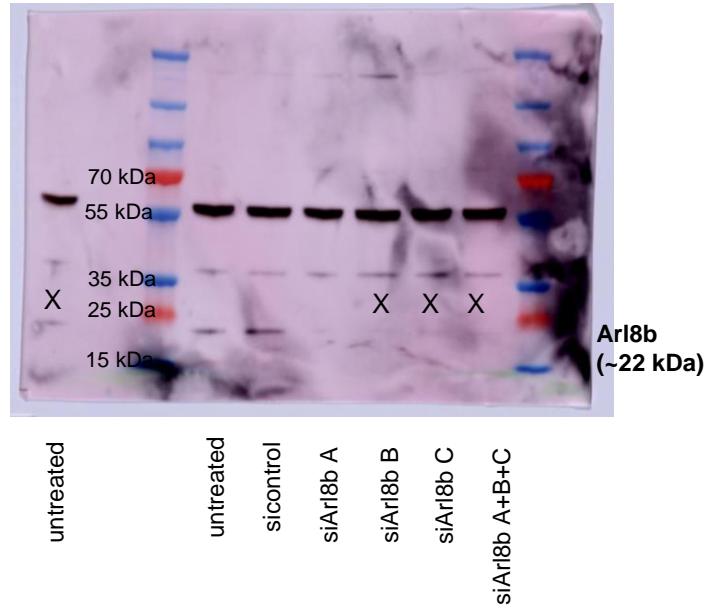

Cell lysates (30  $\mu$ g/lane) of CAD cells untreated (untreated) or treated for 60 h with siRNA scramble (sicontrol)/siRNA Arl8b (siArl8b).

The specific protein bands were visualized using the ECL-immunoblotting chemiluminescence system (GE Healthcare Life sciences) and the ImageQuant LAS 500TM camera (GE Healthcare Life sciences).

From this original image we generated the image in the Fig 7C.
